# Supplementary material for: Deciphering the high overpotential of the oxygen reduction reaction via comprehensively elucidating the open circuit potential
Source: Royal Society of Chemistry journal article supplement (doi:10.1039/d3ee04368a), 2024-01-01
Supplement: d3ee04368a1.pdf [file d3ee04368a1.pdf]

## Supporting information

### Deciphering the High Overpotential of Oxygen Reduction Reaction via Comprehensively Elucidating the Open Circuit Potential

Zenan Wu, Guangxing Yang,\* Zhiting Liu,\* Qiao Zhang, and Feng Peng\*

School of Chemistry and Chemical Engineering, Guangzhou University, Guangzhou 510006, China

**Corresponding authors:** G. Yang (yanggx@gzhu.edu.cn), Z. Liu (liuzt@gzhu.edu.cn), F. Peng (fpeng@gzhu.edu.cn)

#### **This PDF file includes:**

Supplementary text

Figures S1-13

Table S1

Supplementary References

## Supplementary text

### Methods

#### Materials

Pt/C (20 wt%, Johnson Matthey); Deionized water (Milli-Q water system, 18.2 M $\Omega$ ·cm); D<sub>2</sub>O, (99.9 at.% D, Shanghai Aladdin Biochemical Technology Co., Ltd); HClO<sub>4</sub> (72%, Shanghai Aladdin Biochemical Technology Co., Ltd); H<sub>2</sub>SO<sub>4</sub> (GR, Guangzhou Chemistry Reagent Factory); D<sub>2</sub>SO<sub>4</sub> (90 wt% in D<sub>2</sub>O, Shanghai Macklin Biochemical Technology Co., Ltd); Ar, O<sub>2</sub> and H<sub>2</sub> cylinder gases (Ultrahigh purity, Foshan MS Messer Gas Co., Ltd); ethanol (GC, Shanghai Aladdin Biochemical Technology Co., Ltd); Nafion solution (5.0 wt%, Du Pont China Holding Co., Ltd.).

#### Preparation of catalyst inks

As for the preparation of catalyst inks, 4 mg of commercial Pt/C were dispersed in a 2 mL solution composed of DI water (0.2 mL), ethanol (1.8 mL), and 5.0 wt% Nafion solution (12  $\mu$ L), followed by ultrasonication in an ice bath for 30 min. 12.38  $\mu$ L of the catalyst ink was dropped onto the glassy carbon to give a Pt loading of 20  $\mu$ g<sub>Pt</sub> cm<sup>-2</sup> and further dried under rotating conditions at room temperature. The catalyst ink should be preserved in a sealed container and refrigerated after use to avoid solvent evaporation, which may alter the consistency of the catalyst loading in each application.

#### Electrochemical tests

The electrochemical cells and all other glassware used in the experiments were soaked in aqua regia overnight and cleaned prior to electrochemical measurements. The glassware was boiled in DI water five times to thoroughly clean the glassware of residual aqua regia and other trace impurities. All electrochemical measurements were conducted at room temperature in the 5-neck flask (volume of 250 mL or 40 mL) with three-electrode by an electrochemical workstation (CHI760e, Shanghai Chenhua Co., Ltd.). A glassy carbon electrode (Area: 0.2475 cm<sup>2</sup>, RRDE, Pine Instruments), a Pt foil, and the Hg/Hg<sub>2</sub>SO<sub>4</sub> electrode were employed as working electrode, counter electrode, and reference electrode, respectively.

## Electrochemical tests in 0.1 M HClO<sub>4</sub>

A 150 mL solution of 0.1 M HClO<sub>4</sub> was transferred into a 250 mL five-necked flask and purged with Ar for 15 min to remove dissolved O<sub>2</sub>. The Pt/C catalyst was then subjected to 30 cyclic voltammetry cycles between 0.03-1.1 V vs. RHE at a scan rate of 50 mV s<sup>-1</sup> to obtain a stable CV curve. The electrolyte was subsequently replaced with fresh electrolyte and purged with Ar for an additional 15 min for further electrochemical tests.

The Open Circuit Potential (OCP) testing was conducted using the electrochemical workstation's OCPT test technique. The OCP-time curve of Pt/C was recorded under various conditions. The effect of different O<sub>2</sub> partial pressures on OCP was examined by initially recording in an O<sub>2</sub>-free electrolyte with continuous Ar introduction. Once a stable OCP was achieved (where OCP did not significantly change over time), different O<sub>2</sub> partial pressures were quickly set using volumetric flowmeter pressures ( $P_{O_2}/P_0 = 1/3, 1/2, 2/3, 1$ , with a total flow rate of 200 ml min<sup>-1</sup>), and the OCP change was recorded for approximately 15 minutes at each O<sub>2</sub> partial pressure. For the test regarding the impact of pH on OCP, the electrolyte's pH was controlled by successively adding 500 ul, 1000 ul, 2000 ul, and 4000 ul of 0.1 M HClO<sub>4</sub> to 150 ml of deionized water in situ. The OCP changes were recorded for about 10 minutes at each pH under continuous O<sub>2</sub> introduction. The effect of H<sub>2</sub>Pt(OH)<sub>6</sub> on OCP was examined by first recording the OCP-time curve of Pt/C in the O<sub>2</sub>-free electrolyte while Ar was continuously introduced. Upon reaching a stable OCP, pure O<sub>2</sub> was introduced into the electrolyte, and the OCP was continuously recorded until it stabilized. Subsequently, 10 ml of O<sub>2</sub>-saturated electrolyte was withdrawn from the electrolytic cell to ultrasonically dissolve 9 mg of H<sub>2</sub>Pt(OH)<sub>6</sub>, which was then added to the electrolyte in situ using a pipette gun to record the OCP until stabilization. Conversely, in the OCP test where H<sub>2</sub>Pt(OH)<sub>6</sub> was added first and then O<sub>2</sub> was introduced, the OCP-time curve of Pt/C in the O<sub>2</sub>-free electrolyte was first recorded while Ar was continuously introduced. Upon reaching a stable OCP, 10 ml of O<sub>2</sub>-free electrolyte was withdrawn from the electrolytic cell to dissolve 9 mg of H<sub>2</sub>Pt(OH)<sub>6</sub> ultrasonically, then added in situ to the electrolyte using a pipette gun to record the OCP until it stabilized. Subsequently, pure O<sub>2</sub> was introduced into the electrolyte and the OCP was continuously recorded until stabilization.

In the LSV test, each parameter was subjected to independent experiments to eliminate the

effect of Pt/C performance decay during the test process. For example, for different upper limit potentials ( $E_{\text{upl}}$ ) and scanning directions, the cathodic polarization curves between 0.07- $E_{\text{upl}}$  V vs. RHE ( $E_{\text{upl}} = 0.97, 1.07, 1.17$ ) were recorded in sequence from small to large in  $\text{O}_2$ -free electrolyte at a scan rate of  $10 \text{ mV s}^{-1}$  and a rotation rate of 1600 rpm. Then, under the same test conditions (replacing the fresh electrolyte and preparing the working electrode again), the anodic polarization curves between 0.07- $E_{\text{upl}}$  V vs. RHE ( $E_{\text{upl}} = 0.97, 1.07, 1.17$ ) were recorded. The electrolyte was then saturated with  $\text{O}_2$  by bulging  $\text{O}_2$  for 15 min and the cathodic and anodic polarization curves between 0.07- $E_{\text{upl}}$  V vs. RHE ( $E_{\text{upl}} = 0.97, 1.07, 1.17$ ) were recorded sequentially using the same measurement protocol ( $10 \text{ mV s}^{-1}$ , 1600 rpm) (also two independent experiments). For quiet time, cathodic polarization curves for different quiet times (10 s, 20 s, 30 s) were initially recorded in  $\text{O}_2$ -free electrolyte at a scan rate of  $10 \text{ mV s}^{-1}$  and a rotation rate of 1600 rpm between 0.07- $E_{\text{upl}}$  V vs. RHE ( $E_{\text{upl}} = 0.97, 1.07, 1.17$ ). The electrolyte was then saturated with  $\text{O}_2$  by bubbling  $\text{O}_2$  for 15 min and cathodic polarization curves for different Quiet times (10 s, 20 s, 30 s) between 0.07- $E_{\text{upl}}$  V vs. RHE ( $E_{\text{upl}} = 0.97, 1.07, 1.17$ ) under  $\text{O}_2$ -saturated conditions were also recorded sequentially using the same measurement protocol ( $10 \text{ mV s}^{-1}$ , 1600 rpm). For scan rates, cathodic and anodic polarization curves between 0.07-1.07 V vs. RHE were initially recorded in  $\text{O}_2$ -free electrolyte at different scan rates ( $10 \text{ mV s}^{-1}$ ,  $50 \text{ mV s}^{-1}$ ,  $150 \text{ mV s}^{-1}$ ) at a rotation rate of 1600 rpm. The electrolyte was then saturated with  $\text{O}_2$  by bubbling  $\text{O}_2$  for 15 min and cathodic and anodic polarization curves were recorded in the  $\text{O}_2$ -saturated electrolyte at the same scan rates ( $10 \text{ mV s}^{-1}$ ,  $50 \text{ mV s}^{-1}$ ,  $150 \text{ mV s}^{-1}$ ) using the same measurement protocol (0.07-1.07 V vs. RHE, 1600 rpm).

### **Electrochemical tests in deuterated electrolyte.**

A 40 mL five-necked flask was utilized for the tests. A glass carbon electrode (Area:  $0.2475 \text{ cm}^2$ , RRDE, Pine Instruments), a Pt foil, and the Hg/Hg<sub>2</sub>SO<sub>4</sub> electrode were employed as working electrode, counter electrode, and reference electrode, respectively.

In the ORR test, 9 mL of pure 0.5 M D<sub>2</sub>SO<sub>4</sub>/D<sub>2</sub>O was initially added to a clean and dry five-necked flask. The solution was then bubbled with Ar for 15 min to remove  $\text{O}_2$  from the solution. The clean and dry flask was used to avoid the influence of trace amounts of H<sub>2</sub>O in the initial system. Subsequently, cyclic voltammetry curves of the activated Pt/C (the activation step was similar to that in 0.1 M HClO<sub>4</sub>) in the potential range of 0.03-1.3 V vs. RHE was recorded at a scan rate of 50

mV s<sup>-1</sup>. The electrolyte was then saturated with O<sub>2</sub> for 15 min, and polarization curves were recorded for anodic and cathodic scans, respectively, at 1600 rpm in the potential range of 0.08-1 V vs. RHE. After adding an equal volume (9 mL) of 0.5 M H<sub>2</sub>SO<sub>4</sub>/H<sub>2</sub>O to the same system in situ, the same CV and ORR tests were repeated.

In the OCP test, we used the OCPT test technique of the electrochemical workstation to record the OCP-time curve in 9 mL of pure O<sub>2</sub>-free 0.5 M D<sub>2</sub>SO<sub>4</sub>/D<sub>2</sub>O, until the OCP did not change significantly with time, then we quickly set different O<sub>2</sub> partial pressures ( $P_{O_2}/P_0 = 1/3, 1/2, 2/3, 1$ ) by controlling the gas flow rates of Ar and O<sub>2</sub> (with a total flow rate of 200 mL min<sup>-1</sup>) using a volumetric flowmeter, and recorded the change of OCP for about 10 min under each O<sub>2</sub> partial pressure. Next, to avoid the influence of impurities or trace moisture introduced by exposing Pt/C to air, we injected different volumes  $V_{D_2SO_4/D_2O}:V_{H_2SO_4/H_2O} = 1:0, 3:1, 2:1, 1:1, 1:2, 1:3, 0:1$ ) of pure O<sub>2</sub>-saturated 0.5 M H<sub>2</sub>SO<sub>4</sub>/H<sub>2</sub>O into the same system in situ under the condition of O<sub>2</sub> partial pressure of 1, to obtain the change of OCP with different volume ratios of D<sub>2</sub>SO<sub>4</sub>/D<sub>2</sub>O and H<sub>2</sub>SO<sub>4</sub>/H<sub>2</sub>O. In addition, OCP at different O<sub>2</sub> partial pressures ( $P_{O_2}/P_0 = 1/3, 1/2, 2/3, 1$ ) in 9 mL of pure 0.5 M H<sub>2</sub>SO<sub>4</sub>/H<sub>2</sub>O were recorded in the same way.

### **Characterization.**

Transmission electron microscope (TEM) images of Commercial Pt/C were recorded on JEM 2100F (JEOL, Japan) with an aberration corrector operated at 200 kV. Small amounts of the catalyst were suspended in ethanol and then placed on a grid before drying.

The concentration of Pt ions in the solution was examined utilizing an inductively coupled plasma mass spectrometer (ICAP QC) from ThermoFisher Scientific. To more intuitively observe the trend of Pt ion concentration in the solution and to mitigate the error due to the minimal amount of material, 500 μL of catalyst ink was dropped onto a 2 cm\*2 cm hydrophilic carbon paper (which has been subjected to a soaking process in anhydrous ethanol for a duration of 12 hours, followed by multiple rinses using deionized water), achieving a platinum loading of 50 μg<sub>Pt</sub> cm<sup>-2</sup>. The electrode was then infrared heated for a few seconds using an infrared irradiator to increase the adhesion between the catalyst and the conductive carbon paper. Subsequently, the electrode was placed in 150 ml of O<sub>2</sub>-free 0.1 M HClO<sub>4</sub> for OCP testing, and when the OCP did not change with

time, pure O<sub>2</sub> was introduced into the electrolyte, followed by 46 h of OCP testing. During this testing period, 5 ml of the electrolyte and 5 ml of O<sub>2</sub>-saturated fresh electrolyte were withdrawn and re-added sequentially at each time point of 0 h (serving as a baseline), 1 h, 4 h, 10 h, 22 h, and 46 h, respectively. The 5 ml of electrolyte was utilized for ICP detection, while the 5 ml of O<sub>2</sub>-saturated fresh electrolyte was employed to ensure the stability of the test system. It is important to note that the data obtained in the subsequent stages have been adjusted to account for this process. This ensures the accuracy and reliability of the experimental results.

## Calculations

### Calibration of reference electrode.

To accurately calibrate the potentials from  $E$  vs. Hg/Hg<sub>2</sub>SO<sub>4</sub> to  $E$  vs. RHE, the potentials were experimentally calibrated for the different systems (Eq. S1). Prior to each experimental calibration, the solution was purged with H<sub>2</sub> for 15 min. Then, a rotating Pt disk electrode (Area: 0.19625 cm<sup>2</sup>) was used to cycle through the potential range of hydrogen evolution and oxidation to obtain stable the cyclic voltametric (CV) curves at a scan rate of 10 mV s<sup>-1</sup> under 1600 rpm. Finally,  $E_{\text{offset}}$  was obtained by averaging the two voltage intercepts at zero current on the CV curve.

$$E_{\text{RHE}} = E_{\text{measured}} - E_{\text{offset}} \quad \text{Eq. S1}$$

Where  $E_{\text{measured}}$  is  $E$  vs. Hg/Hg<sub>2</sub>SO<sub>4</sub>;  $E_{\text{offset}}$  is the experimentally determined conversion factor, which represents the potential difference between  $E$  vs. Hg/Hg<sub>2</sub>SO<sub>4</sub> and  $E$  vs. RHE.

### Coverage of Pt and Pt oxides.

The potential dependent coverage of Pt can be calculated by the formula:

$$\theta_{\text{Pt}}|_{E=a \text{ V}/b \text{ mV s}^{-1}} = 1 - \frac{Q_{\text{PtO}}|_{E=a \text{ V}/b \text{ mV s}^{-1}}}{Q_{\text{T}}|_{b \text{ mV s}^{-1}}} \quad \text{Eq. S2}$$

where  $\theta_{\text{Pt}}|_{E=a \text{ V}/b \text{ mV s}^{-1}}$  is the Pt coverage at the potential of a V and the scan rate of b mV s<sup>-1</sup>; For  $Q_{\text{PtO}}|_{E=a \text{ V}/b \text{ mV s}^{-1}}$ , there are two cases. For the anodic scan, it represents the accumulated charge when Pt is oxidized to a V at a scan rate of b mV s<sup>-1</sup>. For the cathodic scan, it represents the total reduction charge minus the charge of reducing the oxidized Pt to a V at a scan rate of b mV s<sup>-1</sup>;  $Q_{\text{T}}|_{b \text{ mV s}^{-1}}$  is the total charge of the Pt oxidation/reduction at the scan rate of b mV s<sup>-1</sup>. For electrochemical testing of different  $E_{\text{upl}}$ , the coverage of Pt at 0.4 V vs. RHE (1.17 V vs. RHE) is

assumed to be 1 (0) during cathodic or anodic scanning, so that:

$$Q_{\text{PtO}}|_{E=0.4 \text{ V}/10 \text{ mV s}^{-1}} = 0 \quad \text{Eq. S3}$$

$$Q_{\text{PtO}}|_{E=1.17 \text{ V}/10 \text{ mV s}^{-1}} = Q_{\text{T}}|_{10 \text{ mV s}^{-1}} \quad \text{Eq. S4}$$

which is used as a basis for calculating the coverage of Pt at a certain potential during the testing of different  $E_{\text{upl}}$ . For electrochemical testing at different scan rates, the coverage of Pt at 0.4 V vs. RHE (1.07 V vs. RHE) is assumed to be 1 (0) at 10 mV s<sup>-1</sup> during cathodic or anodic scanning, so that:

$$Q_{\text{PtO}}|_{E=0.4 \text{ V}} = 0 \quad \text{Eq. S5}$$

$$Q_{\text{PtO}}|_{E=1.07 \text{ V}/10 \text{ mV s}^{-1}} = Q_{\text{T}}|_{10 \text{ mV s}^{-1}} \quad \text{Eq. S6}$$

which is used as a basis for calculating the coverage of Pt at a certain potential during the testing of different scan rates.

#### Number of electron transfer.

$$\begin{aligned} E_{\text{ORR}}^{\text{eq}} &= E^{\theta} + \frac{RT}{nF} \ln \frac{a_{(\text{H}^+/\text{D}^+)} P_{\text{O}_2}^{\frac{1}{4}}}{a_{(\text{H}_2\text{O}/\text{D}_2\text{O})}^{\frac{1}{2}}} \\ &= E^{\theta} + \frac{RT}{nF} \ln k_1 + \frac{1}{4} \ln (P_{\text{O}_2}) \\ &= k_2 + \frac{RT}{4nF} \ln (P_{\text{O}_2}) \end{aligned} \quad \text{Eq. S7}$$

The theoretical equilibrium potential for ORR is given by the Nernst equation. Where  $E^{\theta} = 1.229$  V<sub>NHE</sub> is the standard equilibrium potential,  $a_{(\text{H}^+/\text{D}^+)}$  is the activity of protons or deuterium ions in solution,  $P_{\text{O}_2}$  is the dimensionless O<sub>2</sub> pressure,  $a_{(\text{H}_2\text{O}/\text{D}_2\text{O})}$  is the activity of water or heavy water,  $R$  is the ideal gas constant,  $T$  is the Kelvin temperature, and  $F$  is the Faraday constant.

$$k_1 = \frac{a_{(\text{H}^+/\text{D}^+)}}{a_{(\text{H}_2\text{O}/\text{D}_2\text{O})}^{\frac{1}{2}}} \quad \text{Eq. S8}$$

$$k_2 = E^{\theta} + \frac{RT}{nF} \ln k_1 \quad \text{Eq. S9}$$

$E_{\text{ORR}}^{\text{eq}}$  is linearly related to  $\ln(P_{\text{O}_2})$ , other terms being equal.

### Mass-transfer corrected Tafel slope.

$$j_{\text{lim}} = \frac{i_{\text{lim}}}{A} = 0.62nFD^{2/3}\omega^{1/2}\nu^{-1/6}c_{\text{O}_2} \quad \text{Eq. S10}$$

The Levich equation describes the relationship between the diffusion-limited current and the rotation rate in RDE measurements.  $j_{\text{lim}}$  and  $i_{\text{lim}}$  are diffusion-limited current density and current, respectively.  $A$  is the geometric area of the electrode,  $n$  is the electron transfer number,  $F$  is Faraday's constant,  $D$  is the diffusivity,  $\omega$  is the rotation rate,  $\nu$  is the kinematic viscosity, and  $c_{\text{O}_2}$  is the bulk  $\text{O}_2$  concentration.

$$\frac{1}{j_{\text{m}}} = \frac{1}{j_{\text{k}}} + \frac{1}{j_{\text{lim}}} \quad \text{Eq. S11}$$

Koutecký-Levich equation.  $j_{\text{m}}$ ,  $j_{\text{k}}$ , and  $j_{\text{lim}}$  are measured current density, kinetic current density, and diffusion-limited current density.

After i-R correction as well as background correction, the kinetic densities at different potentials are obtained by the above equations, and then plotted in terms of the logarithm of the kinetic current densities and the iR-corrected potentials to finally obtain the Mass-transfer corrected Tafel slope.

### Kinetic inverse effect.

$$\text{KIE} = \frac{j^{\text{H}} c_{\text{O}_2}^{\text{D}}}{j^{\text{D}} c_{\text{O}_2}^{\text{H}}} = \frac{1}{0.908} \frac{j^{\text{H}}}{j^{\text{D}}} = 1.101 \frac{j^{\text{H}}}{j^{\text{D}}} \quad \text{Eq. S12}$$

The H/D KIE is defined as the ratio of the measured kinetic current density in  $\text{H}_2\text{O}$  ( $j^{\text{H}}$ ) and  $\text{D}_2\text{O}$  ( $j^{\text{D}}$ ), respectively, after iR correction, at given potentials based on the Koutecký–Levich equation.  $c_{\text{O}_2}^{\text{H}}$  and  $c_{\text{O}_2}^{\text{D}}$  are  $\text{O}_2$  solubility in  $\text{H}_2\text{O}$  ( $1.269 \times 10^{-3}$  M) and  $\text{D}_2\text{O}$  ( $1.397 \times 10^{-3}$  M) at 25 °C and 1 bar.

### Thermodynamic equilibrium potential of reactions.

Oxygen Evolution Reaction/Oxygen Reduction Reaction:

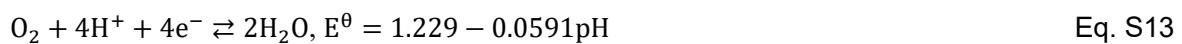

Pt (Oxide) Oxidation/Pt Oxide Reduction:



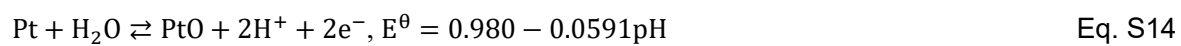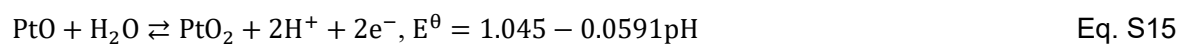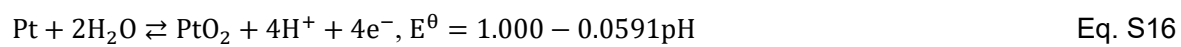

Pt (Oxide) Dissolution/Pt deposition:

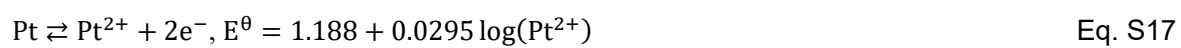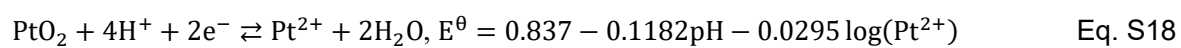

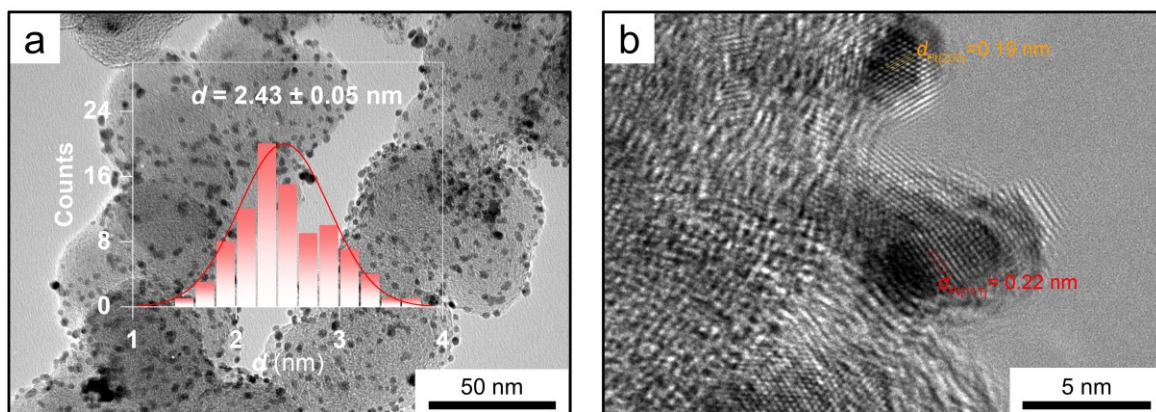

**Fig. S1** (a) Regular and (b) high resolution TEM images of commercial Pt/C. The inset is the histogram of diameters of Pt nanoparticles. The d spacing of 0.22 nm and 0.19 nm can be attributed to the distance of Pt{111} and Pt{200}.

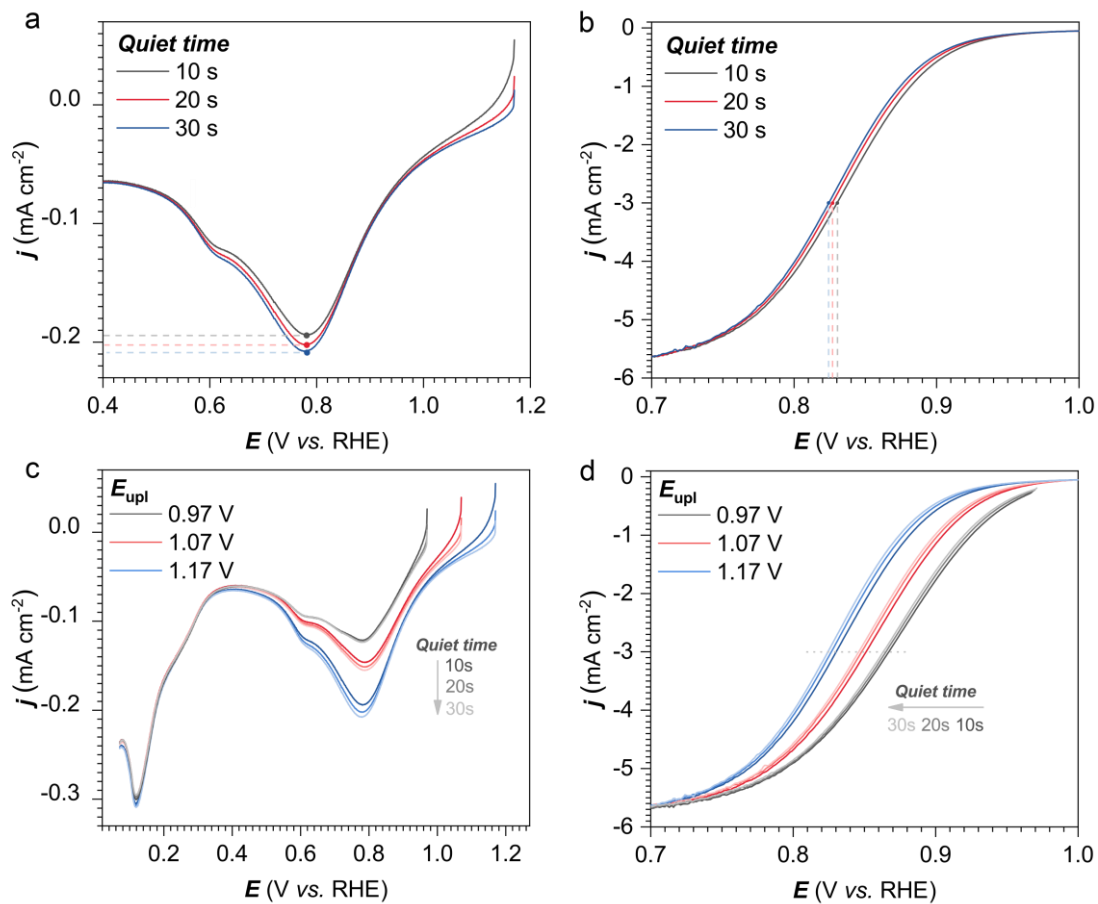

**Fig. S2** Quiet time effect on the LSV curves in (a) O<sub>2</sub>-free and (b) O<sub>2</sub>-saturated electrolytes at 1600 rpm at the scan rate 10 mV s<sup>-1</sup> in 0.1 M HClO<sub>4</sub>. Effect of Quiet time on LSV curves in (c) O<sub>2</sub>-free and (d) O<sub>2</sub>-saturated electrolytes at 1600 rpm at different  $E_{upl}$ .

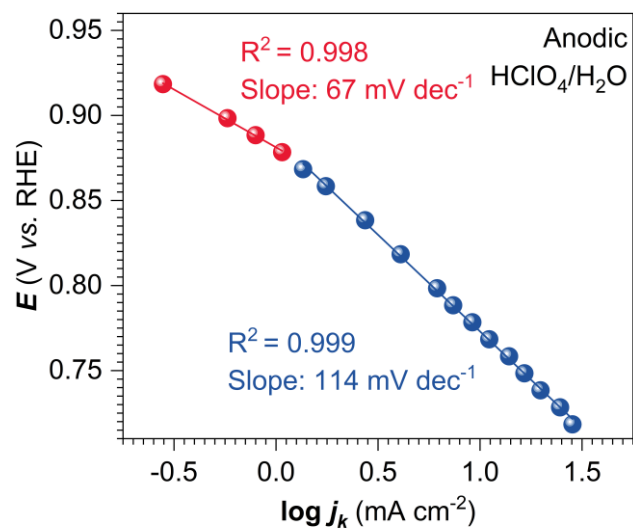

**Fig. S3** Mass-transfer corrected Tafel plots for oxygen reduction reaction 0.1 M HClO<sub>4</sub>.

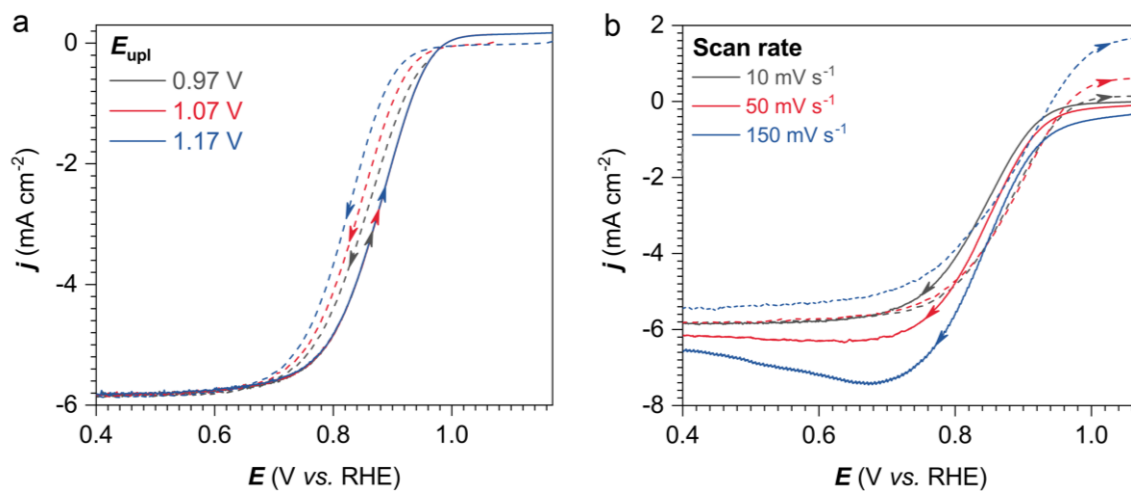

**Fig. S4** (a) The cathodic and anodic scans with different  $E_{\text{upl}}$  in  $\text{O}_2$ -saturated 0.1 M  $\text{HClO}_4$  electrolyte at 1600 rpm at the scan rate of  $10 \text{ mV s}^{-1}$ . (b) The cathodic and anodic scans with different scan rates in  $\text{O}_2$ -saturated 0.1 M  $\text{HClO}_4$  electrolyte at 1600 rpm at different scan rates.

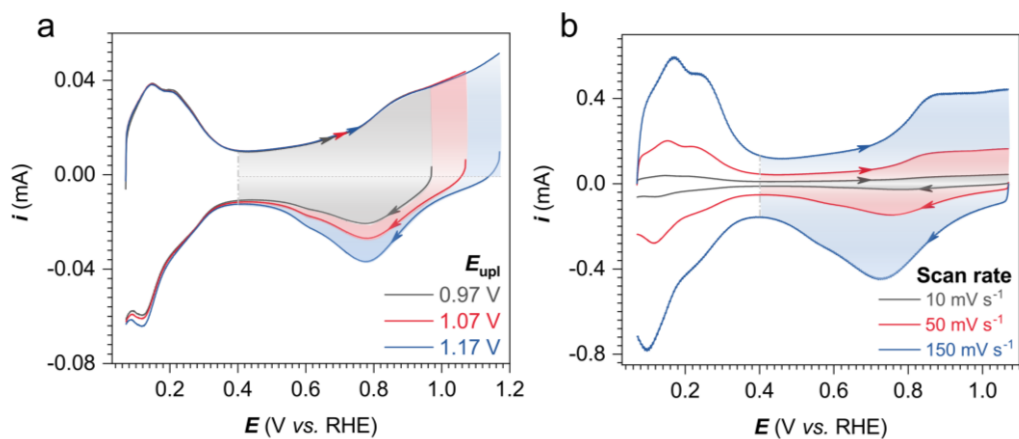

**Fig. S5** (a) The cathodic and anodic scans with different  $E_{upl}$  in  $\text{O}_2$ -free 0.1 M  $\text{HClO}_4$  electrolyte at 1600 rpm at the scan rate of  $10 \text{ mV s}^{-1}$ . (b) The cathodic and anodic scans with different scan rates in  $\text{O}_2$ -free 0.1 M  $\text{HClO}_4$  electrolyte at 1600 rpm at different scan rates. The shaded area in different colors was the integral charge for calculating the proportion of surface Pt oxide.

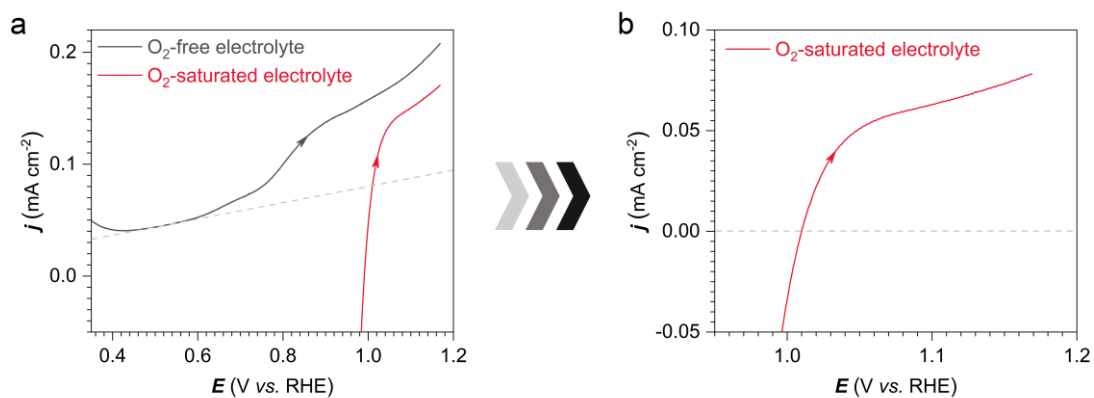

**Fig. S6** (a) The anodic scans in O<sub>2</sub>-saturated (red) and O<sub>2</sub>-free (grey) 0.1 M HClO<sub>4</sub> electrolyte at 1600 rpm at the scan rate of 10 mV s<sup>-1</sup>. (b) the background-corrected anodic scans in O<sub>2</sub>-saturated 0.1 M HClO<sub>4</sub> electrolyte at 1600 rpm at the scan rate of 10 mV s<sup>-1</sup>. It is obtained by subtraction of the dashed line (as the double layer capacitance current) from the red curve in (a).

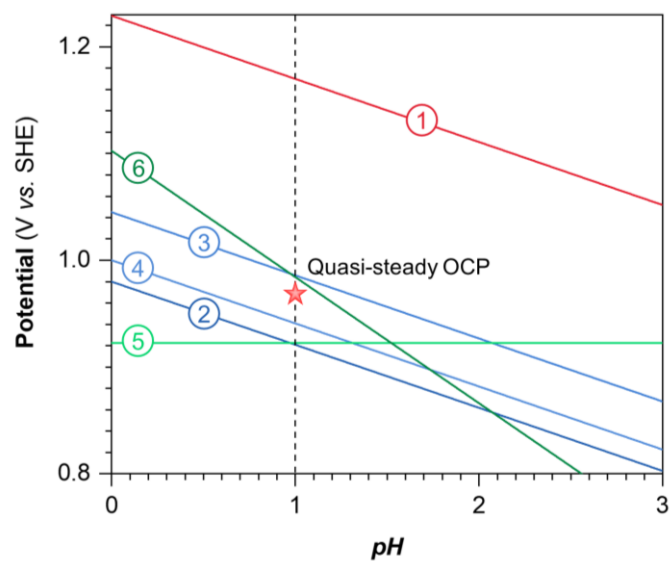

**Fig. S7** Pourbaix diagram of Pt and O<sub>2</sub> in water solution. The lines 1-6 correspond to the equilibrium reactions given by Eq. S13-S18.



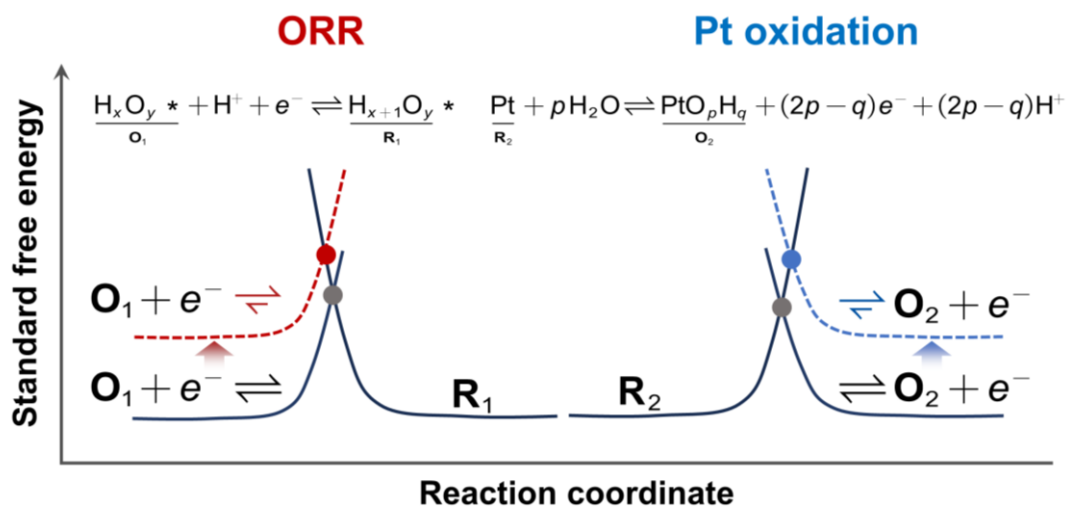

**Fig. S8** Effect of the decrease of the applied potential on the redox reactions of  $O_2$  and Pt. The difference in standard free energy between the state at the intersection point and the state at the initial point represents the activation energy of the oxidation/reduction reaction. Where  $H_xO_y^*$  represents the oxidized species of an elementary reaction step in the ORR and  $H_{x+1}O_y^*$  represents the reduced species of an elementary reaction step in the ORR.  $PtO_pH_q$  is the oxidized product of Pt.

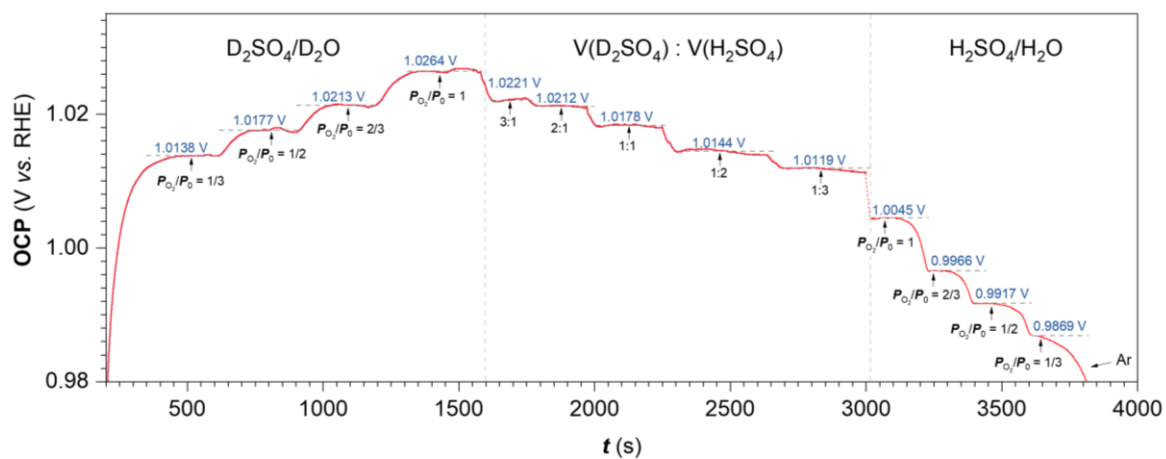

**Fig. S9** The partial pressure of O<sub>2</sub> effect on the OCP in 0.5 M H<sub>2</sub>SO<sub>4</sub>/H<sub>2</sub>O and 0.5 M D<sub>2</sub>SO<sub>4</sub>/D<sub>2</sub>O and the volume ratio of D<sub>2</sub>SO<sub>4</sub>/D<sub>2</sub>O to H<sub>2</sub>SO<sub>4</sub>/H<sub>2</sub>O effect on the OCP in O<sub>2</sub>-saturated electrolyte.

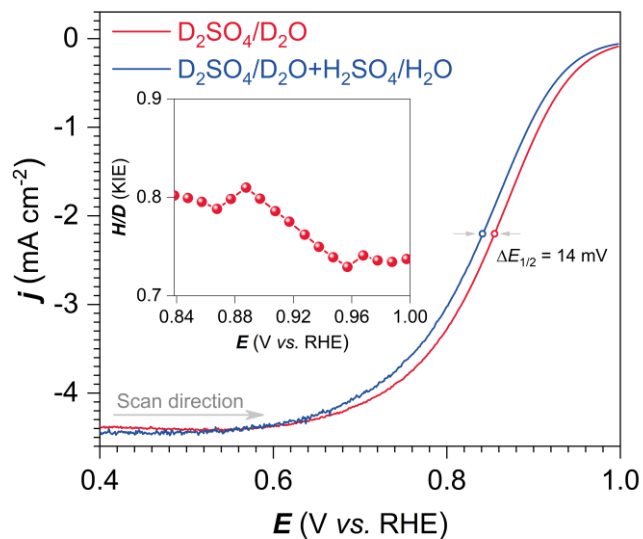

**Fig. S10** The anodic LSV curves of Pt/C in  $O_2$ -saturated 0.5 M  $H_2SO_4/H_2O$  and 0.5 M  $D_2SO_4/D_2O$  electrolytes at the scan rate of  $10$  mV s $^{-1}$ . The inset is the H/D kinetic inverse effect based on the kinetic current density extracted from the Koutecký–Levich equation.

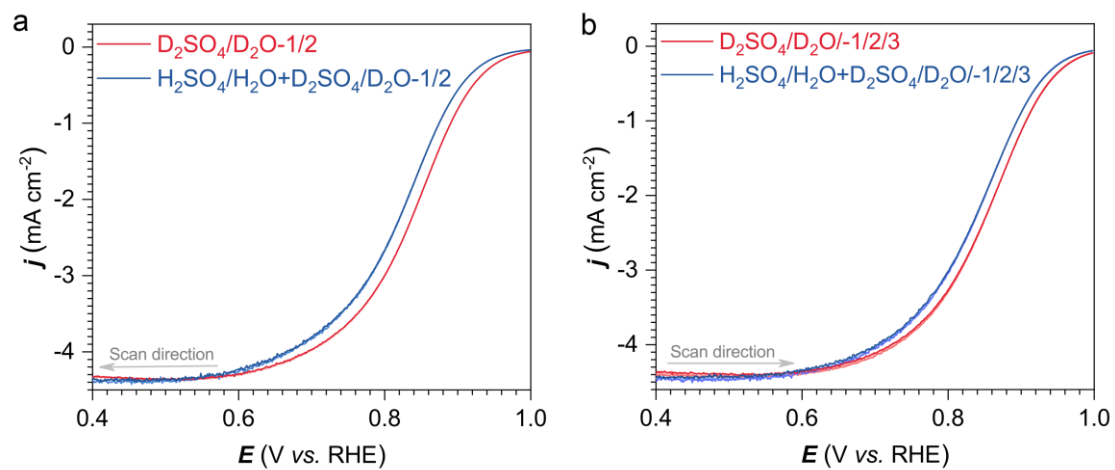

**Fig. S11** The cathodic (a) and anodic (b) LSV curves of Pt/C obtained in two individual experiments in O<sub>2</sub>-saturated 0.5 M H<sub>2</sub>SO<sub>4</sub>/H<sub>2</sub>O and 0.5 M D<sub>2</sub>SO<sub>4</sub>/D<sub>2</sub>O electrolytes at the scan rate of 10 mV s<sup>-1</sup>.

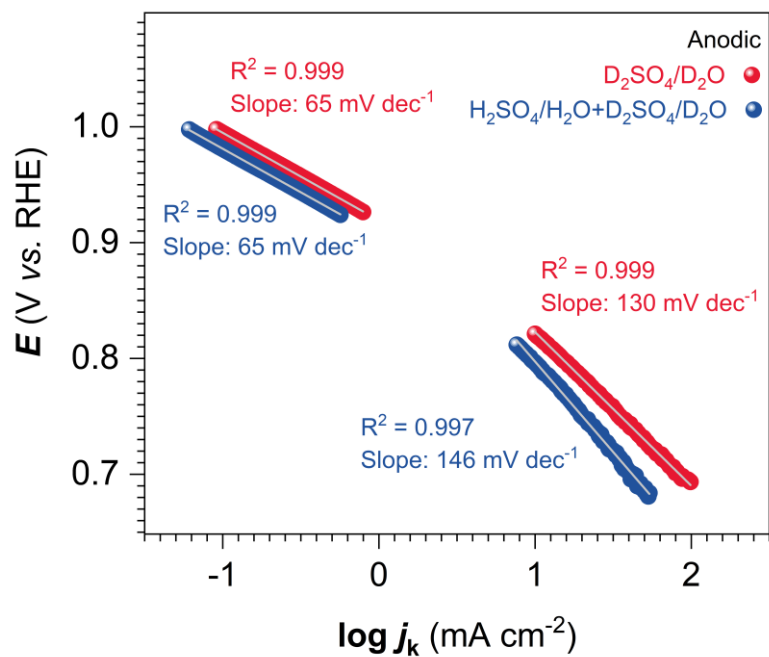

**Fig. S12** Mass-transfer corrected Tafel plots (extracted from **Fig. S9**) for oxygen reduction reaction 0.5 M  $\text{H}_2\text{SO}_4/\text{H}_2\text{O} + 0.5 \text{ M D}_2\text{SO}_4/\text{D}_2\text{O}$  (blue) and 0.5 M  $\text{D}_2\text{SO}_4/\text{D}_2\text{O}$  (red) electrolytes.

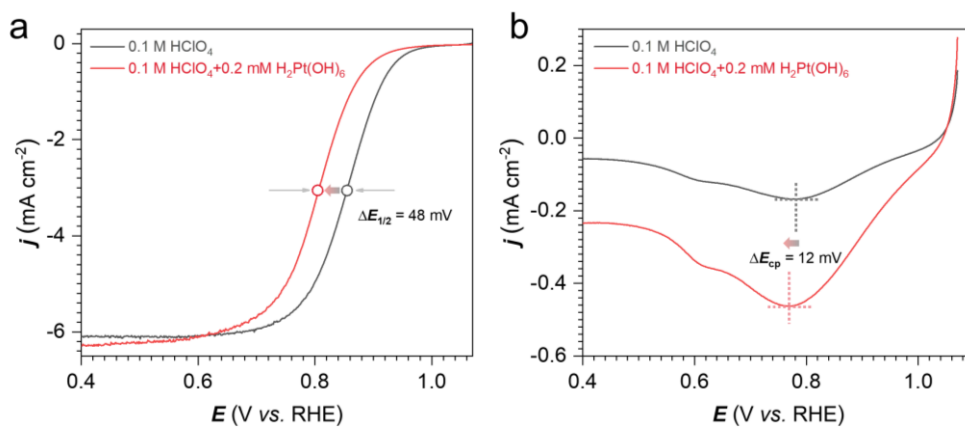

**Fig. S13** Effect of H<sub>2</sub>Pt(OH)<sub>6</sub> on LSV curves obtained in (a) O<sub>2</sub>-saturated and (b) O<sub>2</sub>-free 0.1 M HClO<sub>4</sub> electrolytes at 1600 rpm at the scan rate of 10 mV s<sup>-1</sup>.

**Table S1** Electrochemical performance of materials from the selected publications.

| Target material         | Reference material | Potential from CV/LSV curve                                  |                                                                | Electrolytes                         | Journal                                               |
|-------------------------|--------------------|--------------------------------------------------------------|----------------------------------------------------------------|--------------------------------------|-------------------------------------------------------|
|                         |                    | $E_{cp\text{-target}}/E_{cp\text{-reference}}$<br>@scan rate | $E_{1/2\text{-target}}/E_{1/2\text{-reference}}$<br>@scan rate |                                      |                                                       |
| Pd@Pt                   | Pt/C               | 0.8155/0.7485<br>50 mV s <sup>-1</sup>                       | 0.9259/0.9086<br>10 mV s <sup>-1</sup>                         | 0.1 M HClO <sub>4</sub>              | Journal of the American Chemical Society <sup>1</sup> |
| TiNi@Pt                 | Pt/C               | 0.8830/0.7949<br>50 mV s <sup>-1</sup>                       | 0.8947/0.8385<br>10 mV s <sup>-1</sup>                         | 0.1 M HClO <sub>4</sub>              | Journal of the American Chemical Society <sup>2</sup> |
| PtPb/C                  | Pt/C               | 0.8134/0.7865<br>50 mV s <sup>-1</sup>                       | 0.9546/0.8072<br>10 mV s <sup>-1</sup>                         | 0.1 M HClO <sub>4</sub>              | Science <sup>3</sup>                                  |
| Pd@Pt <sub>2.7L</sub>   | Pt/C               | 0.8599/0.7520<br>50 mV s <sup>-1</sup>                       | 0.9061/0.8767                                                  | 0.1 M HClO <sub>4</sub>              | Nature Communication <sup>4</sup>                     |
| Pt <sub>3</sub> Ni(111) | Pt(111)            | 0.8469/0.7944                                                | 0.9227/0.8624                                                  | 0.1 M HClO <sub>4</sub>              | Science <sup>5</sup>                                  |
| NPG-Pd-Pt               | Pt/C               | 0.7255/0.6765<br>50 mV s <sup>-1</sup>                       | 0.8918/0.8477<br>10 mV s <sup>-1</sup>                         | 0.1 M HClO <sub>4</sub>              | Nature Energy <sup>6</sup>                            |
| Pt-PdCo@Pd/C            | PdCo@Pd/C          | 0.7883/0.7396<br>50 mV s <sup>-1</sup>                       | 0.8889/0.8629<br>5 mV s <sup>-1</sup>                          | 0.1 M HClO <sub>4</sub>              | Journal of the American Chemical Society <sup>7</sup> |
| fct-FePt/C              | Pt/C               | 0.4661/0.3774<br>50 mV s <sup>-1</sup>                       | 0.5329/0.5288<br>5 mV s <sup>-1</sup>                          | 0.5 M H <sub>2</sub> SO <sub>4</sub> | Journal of the American Chemical Society <sup>8</sup> |
| 1D PtNi                 | Pt/C               | 0.7643/0.7356<br>50 mV s <sup>-1</sup>                       | 0.9631/0.8359<br>10 mV s <sup>-1</sup>                         | 0.1 M HClO <sub>4</sub>              | Advanced Materials <sup>9</sup>                       |
| J-PtNWs                 | Pt/C               | 0.8431/0.7283<br>100 mV s <sup>-1</sup>                      | 0.9382/0.8659<br>20 mV s <sup>-1</sup>                         | 0.1 M HClO <sub>4</sub>              | Science <sup>10</sup>                                 |
| Pt-NC                   | Pt/C               | 0.8888/0.7478<br>50 mV s <sup>-1</sup>                       | 0.9176/0.8832<br>10 mV s <sup>-1</sup>                         | 0.1 M HClO <sub>4</sub>              | Science <sup>11</sup>                                 |
| Pt skin                 | Polycrystalline Pt | 0.8168/0.7873<br>50 mV s <sup>-1</sup>                       | 0.8905/0.8482                                                  | 0.1 M HClO <sub>4</sub>              | Nature Materials <sup>12</sup>                        |

| Target material                 | Reference material              | Potential from CV/LSV curve            |                                        | Electrolytes                                                    | Journal                                                |
|---------------------------------|---------------------------------|----------------------------------------|----------------------------------------|-----------------------------------------------------------------|--------------------------------------------------------|
|                                 |                                 | $E_{cp-target}/E_{cp-reference}$       | $E_{1/2-target}/E_{1/2-reference}$     |                                                                 |                                                        |
|                                 |                                 | @scan rate                             | @scan rate                             |                                                                 |                                                        |
| Pt(111)-AC                      | Pt(100) after cycled            | 0.7494/0.5714<br>50 mV s <sup>-1</sup> | 0.8985/0.8281<br>20 mV s <sup>-1</sup> | 0.1 M HClO <sub>4</sub>                                         | Energy & Environmental Science <sup>13</sup>           |
| Pt(111)                         | Pt(100)                         | 0.8009/0.5870                          | 0.8488/0.8022<br>50 mV s <sup>-1</sup> | 0.1 M HClO <sub>4</sub>                                         | Nature Energy <sup>14</sup>                            |
| Pd <sub>6</sub> Pt <sub>3</sub> | Pd <sub>6</sub> Pt <sub>1</sub> | 0.7878/0.7818<br>50 mV s <sup>-1</sup> | 0.8901/0.8686<br>10 mV s <sup>-1</sup> | 0.1 M HClO <sub>4</sub>                                         | Journal of the American Chemical Society <sup>15</sup> |
| np-NiPt+[MTBD][beti]            | np-NiPt                         | 0.7602/0.7423<br>50 mV s <sup>-1</sup> | 0.9997/0.9681<br>10 mV s <sup>-1</sup> | 0.1 M H <sub>2</sub> SO <sub>4</sub><br>0.1 M HClO <sub>4</sub> | Nature Materials <sup>16</sup>                         |
| Pt(111)+THA <sup>+</sup>        | HClO <sub>4</sub>               | 0.8087/0.7951<br>50 mV s <sup>-1</sup> | 0.9066/0.8569<br>10 mV s <sup>-1</sup> | 0.1 M HClO <sub>4</sub>                                         | Nature Communication <sup>17</sup>                     |
| Pt(111) in CsOH                 | LiOH                            | 0.7823/0.7292<br>50 mV s <sup>-1</sup> | 0.9131/0.8165<br>50 mV s <sup>-1</sup> | 0.1 M CsOH<br>0.1 M LiOH                                        | Nature Chemistry <sup>18</sup>                         |
| Cu/Pt(111)                      | Pt(111)                         | 0.9451/0.7858<br>50 mV s <sup>-1</sup> | 0.9036/0.8647<br>50 mV s <sup>-1</sup> | 0.1 M HClO <sub>4</sub>                                         | Journal of the American Chemical Society <sup>19</sup> |
| Pt(111)-CN                      | Pt(111)                         | 0.8523/0.7876<br>50 mV s <sup>-1</sup> | 0.8738/0.8523<br>50 mV s <sup>-1</sup> | 0.05 M H <sub>2</sub> SO <sub>4</sub>                           | Nature Chemistry <sup>20</sup>                         |



## Supplementary References

1. X. Wang, M. Vara, M. Luo, H. Huang, A. Ruditskiy, J. Park, S. Bao, J. Liu, J. Howe, M. Chi, Z. Xie and Y. Xia, *J. Am. Chem. Soc.*, 2015, **137**, 15036-15042.
2. X. Tian, J. Luo, H. Nan, H. Zou, R. Chen, T. Shu, X. Li, Y. Li, H. Song, S. Liao and R. R. Adzic, *J. Am. Chem. Soc.*, 2016, **138**, 1575-1583.
3. L. Bu, N. Zhang, S. Guo, X. Zhang, J. Li, J. Yao, T. Wu, G. Lu, J. Y. Ma, D. Su and X. Huang, *Science*, 2016, **354**, 1410-1414.
4. X. Wang, S.-I. Choi, L. T. Roling, M. Luo, C. Ma, L. Zhang, M. Chi, J. Liu, Z. Xie, J. A. Herron, M. Mavrikakis and Y. Xia, *Nat. Commun.*, 2015, **6**, 7594.
5. V. R. Stamenkovic, B. Fowler, B. S. Mun, G. Wang, P. N. Ross, C. A. Lucas and N. M. Markovic, *Science*, 2007, **315**, 493-497.
6. J. Li, H.-M. Yin, X.-B. Li, E. Okunishi, Y.-L. Shen, J. He, Z.-K. Tang, W.-X. Wang, E. Yücelen, C. Li, Y. Gong, L. Gu, S. Miao, L.-M. Liu, J. Luo and Y. Ding, *Nat. Energy*, 2017, **2**, 17111.
7. D. Wang, H. L. Xin, Y. Yu, H. Wang, E. Rus, D. A. Muller and H. D. Abruna, *J. Am. Chem. Soc.*, 2010, **132**, 17664-17666.
8. J. Kim, Y. Lee and S. Sun, *J. Am. Chem. Soc.*, 2010, **132**, 4996-4997.
9. L. Bu, J. Ding, S. Guo, X. Zhang, D. Su, X. Zhu, J. Yao, J. Guo, G. Lu and X. Huang, *Adv. Mater.*, 2015, **27**, 7204-7212.
10. M. Li, Z. Zhao, T. Cheng, A. Fortunelli, C. Y. Chen, R. Yu, Q. Zhang, L. Gu, B. V. Merinov, Z. Lin, E. Zhu, T. Yu, Q. Jia, J. Guo, L. Zhang, W. A. Goddard, 3rd, Y. Huang and X. Duan, *Science*, 2016, **354**, 1414-1419.
11. L. Zhang, L. T. Roling, X. Wang, M. Vara, M. Chi, J. Liu, S. I. Choi, J. Park, J. A. Herron, Z. Xie, M. Mavrikakis and Y. Xia, *Science*, 2015, **349**, 412-416.
12. V. R. Stamenkovic, B. S. Mun, M. Arenz, K. J. Mayrhofer, C. A. Lucas, G. Wang, P. N. Ross and N. M. Markovic, *Nat. Mater.*, 2007, **6**, 241-247.
13. D. Li, C. Wang, D. S. Strmcnik, D. V. Tripkovic, X. Sun, Y. Kang, M. Chi, J. D. Snyder, D. van der Vliet, Y. Tsai, V. R. Stamenkovic, S. Sun and N. M. Markovic, *Energy Environ. Sci.*, 2014, **7**, 4061-4069.
14. J.-C. Dong, X.-G. Zhang, V. Briega-Martos, X. Jin, J. Yang, S. Chen, Z.-L. Yang, D.-Y. Wu, J. M. Feliu, C. T. Williams, Z.-Q. Tian and J.-F. Li, *Nat. Energy*, 2018, **4**, 60-67.
15. J. X. Wang, H. Inada, L. Wu, Y. Zhu, Y. Choi, P. Liu, W. P. Zhou and R. R. Adzic, *J. Am. Chem. Soc.*, 2009, **131**, 17298-17302.
16. J. Snyder, T. Fujita, M. W. Chen and J. Erlebacher, *Nat. Mater.*, 2010, **9**, 904-907.
17. T. Kumeda, H. Tajiri, O. Sakata, N. Hoshi and M. Nakamura, *Nat. Commun.*, 2018, **9**, 4378.
18. D. Strmcnik, K. Kodama, D. van der Vliet, J. Greeley, V. R. Stamenkovic and N. M. Markovic, *Nat. Chem.*, 2009, **1**, 466-472.
19. I. E. Stephens, A. S. Bondarenko, F. J. Perez-Alonso, F. Calle-Vallejo, L. Bech, T. P. Johansson, A. K. Jepsen, R. Frydendal, B. P. Knudsen, J. Rossmeisl and I. Chorkendorff, *J. Am. Chem. Soc.*, 2011, **133**, 5485-5491.
20. D. Strmcnik, M. Escudero-Escribano, K. Kodama, V. R. Stamenkovic, A. Cuesta and N. M. Markovic, *Nat. Chem.*, 2010, **2**, 880-885.
